# Supplementary material
Source: Springer Nature journal article supplement (https://www.springermedizin.de/resource/supplementary/13045_2013_387_MOESM4_ESM.pdf/9661260)

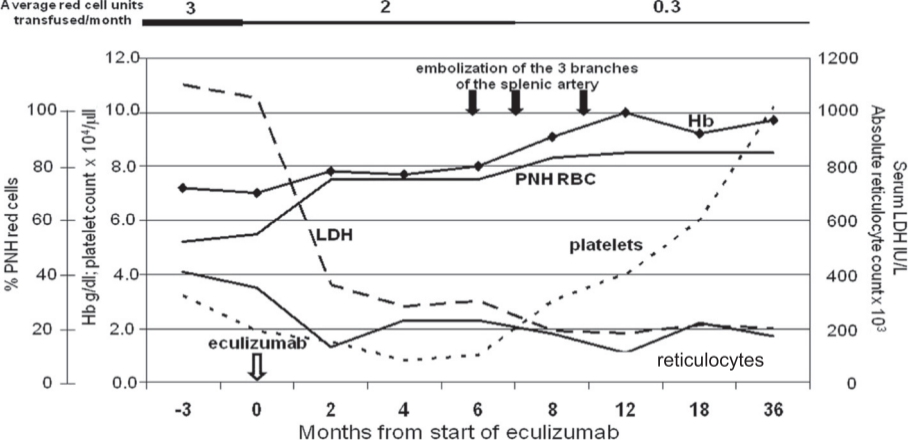

Supplement: MOESM4 [file 9661260]
